# Supplementary material
Source: publisher site journal article supplement (https://www.dovepress.com/article/305024)
Supplement: Supplementary file 1 [file get_supplementary_file.php]

***Supplementary Material***

| **Supplementary Table 1.** Detailed information about the studies and datasets used in our MR study | | | | |
| --- | --- | --- | --- | --- |
| **Trait** | **Study** | **Participants** | **Web source** |
| GDF-15 | Jiang J et al, 2018 | 5,440 individuals of European ancestries | Not available |
| SLE | Bentham J et al, 2015 | 4,036 SLE cases and 6,959 controls of European ancestries | http://insidegen.com/insidegen-LUPUS-data.html |
| SLE (replication) | [Hom G](https://www.ncbi.nlm.nih.gov/pubmed/?term=K%C3%B6ttgen%20A%5BAuthor%5D&cauthor=true&cauthor_uid=23263486) et al, 2008 | 1,311 SLE cases and 1,783 controls of European ancestries | <https://gwas.mrcieu.ac.uk/datasets/ieu-a-815/> |
| RA | Okada Y et al, 2013 | 14,361 RA cases and 43,923 controls of European ancestries | <http://plaza.umin.ac.jp/~yokada/datasource/software.htm> |
| IBD | de Lang KM et al, 2017 | 25,042 IBD cases and 34,915 controls of European ancestry | ftp://ftp.sanger.ac.uk/pub/project/humgen/summary_statistics/human/2016-11-07 |
| Inflammatory cytokines | Ahola-Olli AV et al, 2017 | 8,293 individuals of European ancestries | <http://computationalmedicine.fi/data#Cytokine_GWAS> |

Abbreviations: GDF-15, growth differentiation factor 15; MR, Mendelian randomization; RA, rheumatoid arthritis; SLE, systemic lupus erythematosus.

| **Supplementary Table 2.** SNPs reported to be associated with circulating levels of GDF-15 in previous GWAS meta-analysis | | | | | | | |
| --- | --- | --- | --- | --- | --- | --- | --- |
| SNP | Gene | Effect allele | Other allele | MAF | β | Se | *P* | |
| rs888663 | *PGPEP1* | T | G | 0.187 | 0.3029 | 0.0244 | 2.644×10-35 | |
| rs749451 | *PGPEP1* | C | T | 0.434 | 0.2178 | 0.0187 | 2.539×10-31 | |
| rs1054564 | *GDF15* | C | G | 0.182 | 0.3080 | 0.0257 | 3.448×10-33 | |
| Abbreviations: GDF-15, growth differentiation factor 15; GWAS, genome-wide association study; MAF, minor allele frequency; SNP, single nucleotide polymorphism. | | | | | | | |

| **Supplementary Table 3.** Variance explained by the selected instruments and F-statistic for the MR analysis | | |
| --- | --- | --- |
| Exposure | Variance explained (R2) | F-statistic |
| rs888663 | 0.0279 | 156.06 |
| rs749451 | 0.0233 | 129.76 |
| rs1054564 | 0.0282 | 158.07 |

| **Supplementary Table 4.** Associations of inflammatory cytokines with genetic instruments | | | | | | | | | | | |
| --- | --- | --- | --- | --- | --- | --- | --- | --- | --- | --- | --- |
| Inflammatory cytokines | rs888663 (EA: T) | | |  | rs749451 (EA: C) | | |  | rs1054564 (EA: C) | | |
| β | Se | *P** |  | β | Se | *P** |  | β | Se | *P** |
| TNF-α | 0.0056 | 0.0347 | 0.8649 |  | 0.0012 | 0.0240 | 0.9606 |  | -0.0166 | 0.0456 | 0.7127 |
| IFN-γ | 0.0006 | 0.0238 | 0.9777 |  | -0.0076 | 0.0164 | 0.6500 |  | -0.0207 | 0.0310 | 0.4953 |
| IL-1β | 0.0193 | 0.0268 | 0.8713 |  | -0.0159 | 0.0186 | 0.5842 |  | -0.0048 | 0.0350 | 0.6499 |
| IL-4 | 0.0160 | 0.0232 | 0.4837 |  | 0.0077 | 0.0159 | 0.6165 |  | -0.0091 | 0.0303 | 0.7486 |
| IL-6 | 0.0252 | 0.0231 | 0.2759 |  | 0.0254 | 0.0159 | 0.1079 |  | 0.0206 | 0.0301 | 0.4980 |
| IL-10 | 0.0374 | 0.0236 | 0.1076 |  | -0.0016 | 0.0163 | 0.9263 |  | -0.0159 | 0.0210 | 0.6133 |
| IL-12 | 0.0005 | 0.0229 | 0.9741 |  | -0.0218 | 0.0158 | 0.1700 |  | -0.0337 | 0.0299 | 0.2551 |
| IL-17 | 0.0090 | 0.0236 | 0.6797 |  | -0.0047 | 0.0163 | 0.7793 |  | -0.0148 | 0.0310 | 0.6370 |
| Abbreviations: EA, effect allele.  *After Bonferroni correction, only *P* values lower than 0.002 (0.05 ÷ 3 SNPs ÷ 8 phenotypes) were considered statistically significant. | | | | | | | | | | | |


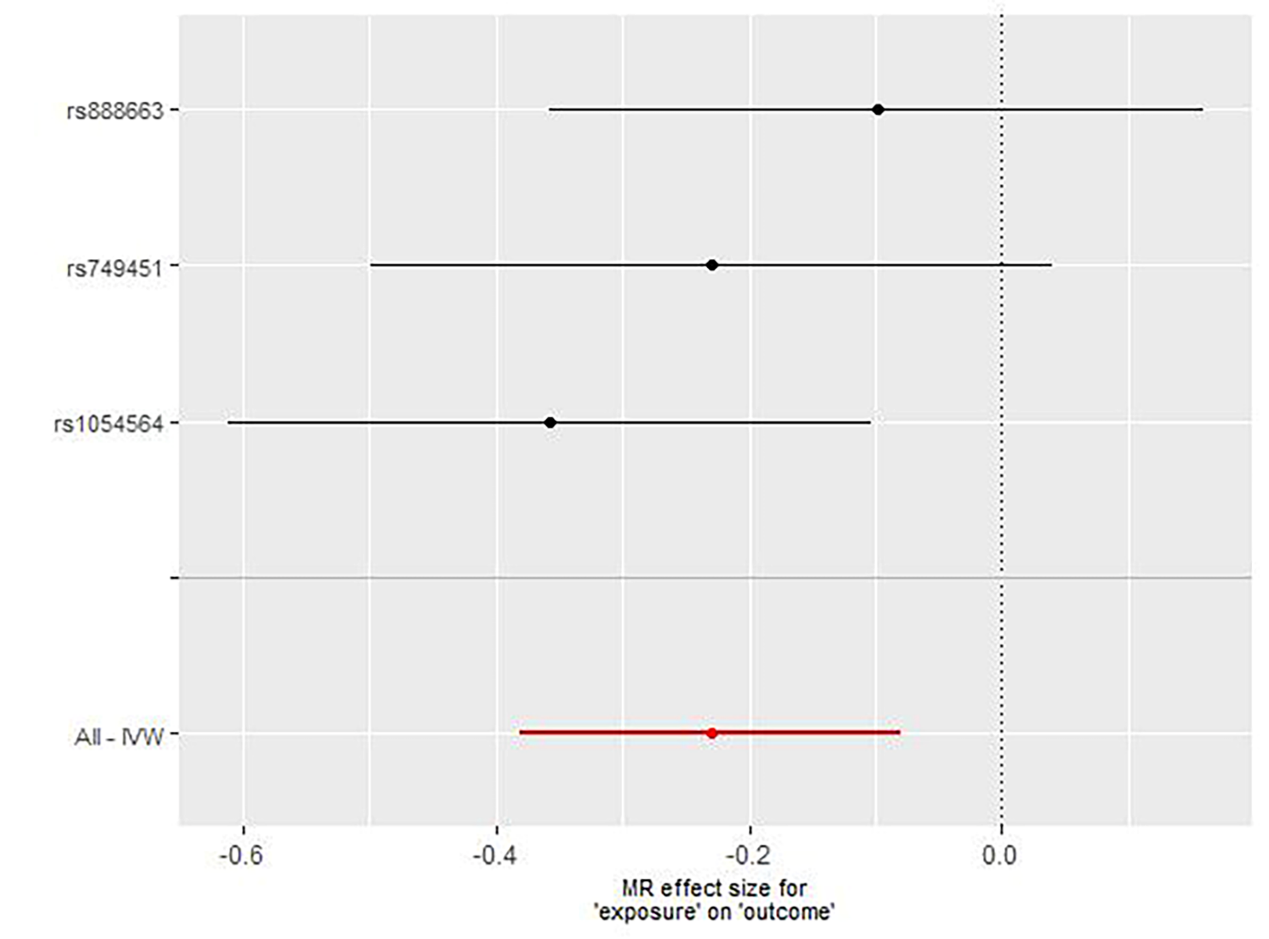


**Supplementary Figure 1.** Results of the single-SNP analyses for the SNP effect of circulating GDF-15 on risk of SLE. The red lines visualize the results of the multi-SNP analysis combing the single SNP effect. The effect size was expressed as β value in the forest plot.
